# Supplementary material for: PLED devices containing triphenylamine-derived polyurethanes as hole-transporting layers exhibit high current efficiencies
Source: Royal Society of Chemistry journal article supplement (doi:10.1039/b715929c), 2008-01-01
Supplement: b715929c.pdf [file b715929c.pdf]

# PLED Devices Containing Triphenylamine-Derived Polyurethanes as Hole-Transporting Layers Exhibit High Current Efficiencies

## Supplementary Information

Experimental details and NMR, Mass spectral data of compounds **1-6**, **PU polymers** data collected in UV-Vis, PL, IR spectra and thermo property in DSC, TGA.

The PLED device fabrication details and measurements for PU polymers. (20 pages)

## Tables of Content

|                                                                                                                              |       |
|------------------------------------------------------------------------------------------------------------------------------|-------|
| General-----                                                                                                                 | 2     |
| Experimental procedures and characterization for compounds <b>1-6</b> and PU polymers <b>P1-P5</b> -----                     | 3-6   |
| OLED device fabrication details and measurements-----                                                                        | 7     |
| Accelerated life-time measurement-----                                                                                       | 8     |
| UV-Vis, PL, IR spectra, DSC, and TGA figures for PU polymer <b>P1-P5</b> -----                                               | 9-11  |
| <sup>1</sup> H and <sup>13</sup> C NMR spectra for <b>1-6</b> , and <sup>1</sup> H spectra for PU polymer <b>P1-P5</b> ----- | 12-21 |
| References-----                                                                                                              | 21    |

## General

$^1\text{H}$  NMR spectra were recorded on a Bruker 400 MHz spectrometer. Elemental analyses were performed on an EA Heraeus Vario EL-3 analyzer. FTIR spectra were recorded using a Jasco-480 spectrometer. UV–Vis analyses were performed using a Jasco V-570 UV–Vis spectrophotometer. UV absorbance measurements of solutions were obtained after dissolving the compound (5 mg) in THF (400 mL); for films, samples were prepared by placing a drop of a pertinent THF solution (12 mg/1 mL) onto a quartz slice and spin-coating at 2000 rpm. The UV absorbance spectra of the PU solutions and films were recorded over the range 200–800 nm. The number-average and weight-average molecular weights of the polymers were determined using a Waters GPC-480 system, an AM GPC gel column (10  $\mu\text{m}$ ; American Polymer Standard Company), THF as the eluent, and polystyrene standards. TGA and DSC measurements were undertaken using a TGA Perkin–Elmer TGA-7 instrument and a DSC Du Pont 2010 analyzer, operated under a nitrogen atmosphere at a heating rate of 10  $^{\circ}\text{C}/\text{min}$ . The thickness of the polymer films was measured using an Alpha step Dektak 3030 profilometer. PL spectra of the polymers were recorded using a Hitachi-4500 spectrofluorometer; solutions: 5 mg/20 mL in THF; films: spin-coating a 15 mg/1 mL THF solution on a quartz slice at 2000 rpm. The excitation wavelength for the fluorescence measurements was 360 nm (Xe lamp). Electroluminescence spectra were recorded using a Minolta CS-1000 instrument. The  $I$ – $V$  and  $L$ – $V$  characteristics of the devices were measured by integrating a Keithley 2400 source-meter as the voltage and current source with a Minolta CS1000 instrument as the luminance detector. All measurement and device fabrication processes were performed in air at room temperature under dust-controlled conditions.

## Synthesis of Monomers

### ***N,N'*-Bis(4-methoxyphenyl)-*N,N'*-diphenylbenzidine (1)**

*N,N'*-Diphenylbenzidine (20 g, 0.06 mol), 4-iodoanisole (50 g, 0.21 mol),  $K_2CO_3$  (65.6 g, 0.47 mol), 18-crown-6 (3.1 g, 0.011 mol), and 1,2-dichlorobenzene (400 mL) were charged in a two-neck flask and stirred at 190 °C for 36 h. After the reaction was complete, the excess iodoanisole and solvent in the mixture were removed through distillation under reduced pressure. The mixture was partitioned between  $CH_2Cl_2$  and  $H_2O$  and the organic phase separated to remove the inorganic salts. The final product was purified by column chromatography with ( $CH_2Cl_2$ /hexane, 1:1). Evaporation of the solvent yielded **1** (23.35 g, 73%).  $^1H$  NMR (400 MHz,  $CD_3OD$ )  $\delta$  7.4 (d,  $J = 8.4$  Hz, 4H), 7.25–7.21 (m, 4H), 7.11–7.06 (m, 12H), 6.97–6.94 (m, 2H), 6.85 (d,  $J = 8.8$  Hz, 4H), 3.81 (s, 6H).  $^{13}C$  NMR (400 MHz,  $CD_3OD$ )  $\delta$  129.09, 127.09, 122.65, 114.77, 55.47.

### ***N,N'*-Bis(4-hydroxyphenyl)-*N,N'*-diphenylbenzidine (2)**

*N,N'*-Bis(4-methoxyphenyl)-*N,N'*-diphenylbenzidine (16.7 g, 0.03 mol) and dichloromethane (45 mL) were charged in a two-neck flask and then a mixture of  $BBr_3$  (12 mL) and  $CH_2Cl_2$  (25 mL) was added and stirred for 2 h at  $-78$  °C. After the reaction was complete, aqueous  $NaHCO_3$  (100 mL) was added to the flask dropwise to quench the reaction. The mixture was partitioned between ethyl acetate and  $H_2O$  and the organic phase separated and evaporated to dryness. The final product was purified by column chromatography ( $CH_2Cl_2$ /EtOAc, 4:1) to yield **2** in 92% yield.  $^1H$  NMR (400 MHz,  $CD_3OD$ )  $\delta$  7.32 (d,  $J = 8.0$  Hz, 4H), 7.19–7.11 (m, 4H), 6.95–6.81 (m, 14H), 6.85 (d,  $J = 11.7$  Hz, 4H).  $^{13}C$  NMR (400 MHz,  $CD_3OD$ )  $\delta$  153.39, 147.58, 146.49, 138.87, 133.17, 128.11, 126.82, 125.98, 121.89, 121.74, 120.84, 115.22.

**3,6-Dibromo-9H-carbazole (3)<sup>1</sup>**

A two-neck round-bottom flask was equipped with a magnetic stirrer bar, a nitrogen gas inlet and a 250-mL addition funnel. Carbazole (6.5 g, 38.9 mmol) dissolved in toluene (35 mL) was added into the flask and cooled in an ice bath. A solution of *N*-bromosuccinimide (15 g, 84.2 mmol) in DMF (100 mL) was added into the flask transfer through the addition funnel. After reacting for 30 min, the mixture was poured into cold water to precipitate the product, which was filtered, washed with cold methanol, and then recrystallized (MeOH/hexane, 5:1). The product was obtained as white crystals (11.6 g, 92%). <sup>1</sup>H NMR (400 MHz, CDCl<sub>3</sub>) δ 8.13 (s, 2H), 8.10 (s, 1H), 7.52 (d, *J* = 6.8 Hz, 2H), 7.13 (d, *J* = 8.6 Hz, 2H). <sup>13</sup>C NMR (400 MHz, CDCl<sub>3</sub>) δ 138.4, 129.3, 124.1, 123.3, 112.7, 112.2.

**3,6-Dibromo-9-butylcarbazole (4)<sup>2</sup>**

3,6-Dibromo-9H-carbazole (2.63 g, 8.1 mmol), C<sub>4</sub>H<sub>9</sub>Br (2.1 mL, 13 mmol), [(C<sub>4</sub>H<sub>9</sub>)<sub>4</sub>N]HSO<sub>4</sub> (0.1 g, 0.03 mmol), and KOH (1 g, 18 mmol) were dissolved in acetone (20 mL) under N<sub>2</sub> in a two-neck round-bottom flask equipped with a stirrer bar and then the mixture was heated under reflux at 90 °C for 5 h. After cooling to room temperature, the reaction mixture was extracted with dichloromethane and the organic phase evaporated to dryness. The product (2.3 g, 65%) was obtained after recrystallization (MeOH/hexane, 1:1). <sup>1</sup>H NMR (400 MHz, CDCl<sub>3</sub>) δ 8.11 (s, 2H), 7.54 (d, *J* = 6.8 Hz, 2H), 7.25 (d, *J* = 10.6 Hz, 2H), 4.22 (t, *J* = 7.16 Hz, 2H), 1.84–1.76 (m, 2H), 1.40–1.30 (m, 2H), 0.94 (t, *J* = 7.36 Hz, 3H). <sup>13</sup>C NMR (400 MHz, CDCl<sub>3</sub>) δ 139.3, 128.9, 123.4, 114.5, 111.9, 110.3, 43.0, 30.9, 20.4, 13.8.

**9-Butyl-3,6-bis(4-methoxyphenyl)carbazole (5)**

A two-neck round-bottom flask equipped with a condenser and stirrer bar was placed under vacuum to remove oxygen and then filled with argon. 3,6-Dibromo-9-butylcarbazole (3.97 g, 10 mmol), 4-MeOC<sub>6</sub>H<sub>4</sub>B(OH)<sub>2</sub> (3.19 g, 21

mmol), and Pd(PPh<sub>3</sub>)<sub>4</sub> (340 mg, 0.3 mmol) were added to the flask, followed by potassium phosphoric acid solution (2 M, 50 mL), P<sup>t</sup>Bu<sub>3</sub> (0.05 M in toluene, 12 mL, 0.6 mmol), and THF (200 mL). The mixture was heated under reflux for 3 days and then cooled to room temperature and quenched with NaCl solution. Extraction of the mixture with dichloromethane, concentration, and column chromatography (EtOAc/hexane, 1:5) provided the product (3.04 g, 70%). <sup>1</sup>H NMR (400 MHz, CDCl<sub>3</sub>) δ 8.30 (s, 2H), 7.68 (d, *J* = 8.4 Hz, 2H), 7.66 (d, *J* = 8.8 Hz, 4H), 7.45 (d, *J* = 8.5 Hz, 2H), 7.03 (d, *J* = 12 Hz, 4H), 4.34 (t, *J* = 8.0 Hz, 2H), 3.88 (s, 6H), 1.92–1.87 (m, 2H), 1.47–1.41 (m, 2H), 0.98 (t, *J* = 7.4 Hz, 3H). <sup>13</sup>C NMR (400 MHz, CDCl<sub>3</sub>) δ 158.5, 140.1, 134.8, 132.0, 128.2, 124.9, 123.4, 118.4, 114.2, 108.9, 55.4, 43.0, 31.2, 20.6, 13.9.

#### **9-Butyl-3,6-bis(4-hydroxyphenyl)carbazole (6)**

9-Butyl-3,6-bis-(4-methoxyphenyl)carbazole (4.35g, 10 mmol) was dissolved in CH<sub>2</sub>Cl<sub>2</sub> (10 mL) in a two-neck round-bottom flask equipped with a stirrer bar, an addition funnel, and a N<sub>2</sub> inlet. BBr<sub>3</sub> (4.9 g, 20 mmol) in CH<sub>2</sub>Cl<sub>2</sub> (7.0 mL) was added to the flask at –78 °C. After reacting for 8 h, the mixture was quenched with aqueous Na<sub>2</sub>CO<sub>3</sub> at –78 °C. The mixture was partitioned between CH<sub>2</sub>Cl<sub>2</sub> and H<sub>2</sub>O, the organic phase was separated and evaporated to dryness, and the residue subjected to column chromatography (hexane/CH<sub>2</sub>Cl<sub>2</sub>, 1:3) to provide **6** (2.84 g, 70%). <sup>1</sup>H NMR (400 MHz, CD<sub>3</sub>OD) δ 8.27 (s, 2H), 7.62 (d, *J* = 8.4 Hz, 2H), 7.54 (d, *J* = 8.5 Hz, 4H), 7.47 (d, *J* = 8.5 Hz, 2H), 6.88 (d, *J* = 8.5 Hz, 4H), 4.34 (t, *J* = 8.0 Hz, 2H), 1.88–1.80 (m, 2H), 1.43–1.33 (m, 2H), 0.94 (t, *J* = 6 Hz, 3H). <sup>13</sup>C NMR (400 MHz, CD<sub>3</sub>OD) δ 155.4, 139.3, 133.0, 131.6, 127.1, 123.8, 122.2, 116.8, 114.6, 108.1, 43.3, 30.3, 19.45, 12.2.

## Synthesis of PU Polymers P1–P5

**Typical procedure: (P1).** *N,N'*-Bis(4-hydroxyphenyl)-*N,N'*-diphenylbenzidine (**2**) (0.520 g, 0.001 mol), isophorone diisocyanate (0.265 g, 0.25 mL, 0.001 mol) and dry THF (20 mL) were charged in a two-neck flask and stirred for 24 h at 50 °C under N<sub>2</sub>. 4-*tert*-Butylphenol (15 mg, 0.1 mmol) was added and the mixture stirred for 2 h. When the reaction was complete, the polymer was precipitated dropwise into methanol and collected. The cycle of dissolution in THF and precipitation in methanol was repeated. The final PU sample (88% yield) was collected and dried under vacuum for 12 h. M.p. 260 °C. Anal. Calcd (based on the calibrated composition listed in Scheme 1): C, 74.1; H, 6.60; N, 9.0%. Found: C, 73.9; H, 6.84; N: 8.8%. <sup>1</sup>H NMR (400 MHz, DMSO-*d*<sub>6</sub>) δ 7.6–7.4 (m, 4H), 7.3–7.2 (m, 4H), 7.1–6.9 (m, 18H), 3.7–3.6 (m, 4H), 1.2–0.7 (m, 15H). For the syntheses of copolymers **P2–P5**, the feeding ratios of the reagents are summarized in Scheme 2.

**P2** (92%). M.p. 263 °C. Calcd.: C, 74.0; H, 6.68; N, 8.75%. Found: C, 75.2; H, 7.00; N: 8.8%. <sup>1</sup>H NMR (400 MHz, DMSO-*d*<sub>6</sub>) δ 7.8–7.4 (m, 8H), 7.3–7.2 (m, 6H), 7.1–6.9 (m, 16H), 3.7–3.6 (m, 4H), 1.2–0.7 (m, 18H).

**P3** (89%). M.p. 265 °C. Calcd.: C, 73.9; H, 6.77; N, 8.51%. Found: C, 74.1; H, 7.00; N, 8.38%. <sup>1</sup>H NMR (400 MHz, DMSO-*d*<sub>6</sub>) δ 7.7–7.4 (m, 12H), 7.25–7.2 (m, 7H), 7.0–6.7 (m, 15H), 3.65–3.55 (m, 4H), 1.2–0.7 (m, 19H).

**P4** (92%). M.p. 262 °C. Calcd.: C, 73.9; H, 6.85; N, 8.26%. Found: C, 74.64; H, 7.10; N, 8.11%; <sup>1</sup>H NMR (400 MHz, DMSO-*d*<sub>6</sub>) δ 7.6–7.4 (m, 18H), 7.25–7.2 (m, 10H), 7.0–6.7 (m, 10H), 3.65–3.55 (m, 4H), 1.2–0.7 (m, 20H).

**P5** (90%). M.p. 256 °C. Calcd.: C, 73.8; H, 6.9; N, 8.0%. Found: C, 72.9; H, 7.4; N, 7.4%; <sup>1</sup>H NMR (400 MHz, DMSO-*d*<sub>6</sub>) δ 8.4–8.6 (m, 2H), 8.0–7.5 (m, 14H), 7.3–7.1 (m, 2H), 1.8–1.3 (m, 17H).

**Device Fabrication details and measurements.**

The devices were fabricated in two structures: (1) ITO/PU (20 nm)/[Ir(ppy)<sub>3</sub>+t-PBD+PVK] (50 nm)/Mg (10 nm)/Ag (100 nm) and (2) ITO/PEDOT:PSS (30 nm)/PU (20 nm)/[Ir(ppy)<sub>3</sub>+t-PBD+PVK] (50 nm)/Mg (10 nm)/Ag (100 nm). The ITO surface was cleaned through sonication and rinsing sequentially in deionized water, aqueous Triton-100 solution, deionized water, acetone, and methanol. For system (1) structures, the hole-injection PEDOT:PSS layer was spin-coated at 5000 rpm for 60 s on top of the ITO glass and then dried on a hot plate at 130 °C for 30 min under vacuum. Each polymer solution for spin coating (concentration: 10 mg/mL in THF) was filtered through a membrane filter having a channel size of 0.45 μm. The PU solution was spin-coated at 4000 rpm for 60 s onto the prepared ITO/PEDOT-PSS anode and then dried under reduced pressure for 30 min at 120 °C. The Ir(PPy)<sub>3</sub>+PVK+t-PBD solution [Ir(PPy)<sub>3</sub>, 12.5 mg; PVK, 20 mg; t-PBD, 50 mg] in chloroform (4 mL) was spin-coated at 3000 rpm for 90 s onto the surface of ITO/PEDOT:PSS/PU. The Mg and Ag contacts were deposited on the ITO/PEDOT-PSS/PU at a pressure below 10<sup>-6</sup> torr. The deposition rates for the Mg and Ag cathodes were 1.5 and 4.5 Å/s, giving an active area of 0.1256 cm<sup>2</sup>.

## Life-time measurement of devices

Non-linear regression analysis revealed that the decay curves matched well with the equation of  $B = B_0(C_1e^{-k't} + C_2e^{-k''t})$ , where  $k'$  and  $k''$  are the decay constants for the fast and slow phases of the decay, and  $C_1$  and  $C_2$  are the contribution of these two processes on the EL<sup>3</sup>.  $\tau_1$  and  $\tau_2$  are half-lives defined as  $\tau_1 = 0.69 k'$ ,  $\tau_2 = 0.69 k''$ .

| Device | $B_0$ | $C_1, k', \tau_1$ (h) | $C_2, k'', \tau_2$ (h) |
|--------|-------|-----------------------|------------------------|
| DP1    | 1040  | 0.45, 0.57, 4.02 h    | 0.26, 0.091, 12.20 h   |
| DP5    | 1262  | 0.51, 0.58, 4.17 h    | 0.24, 0.099, 14.15 h   |
| DDP1   | 2319  | 0.48, 0.62, 6.20 h    | 0.30, 0.035, 43.19 h   |
| DDP5   | 2015  | 0.47, 0.60, 6.23 h    | 0.34, 0.031, 46.85 h   |
| S2     | 1205  | 0.52, 0.61, 6.13 h    | 0.31, 0.040, 33.12 h   |

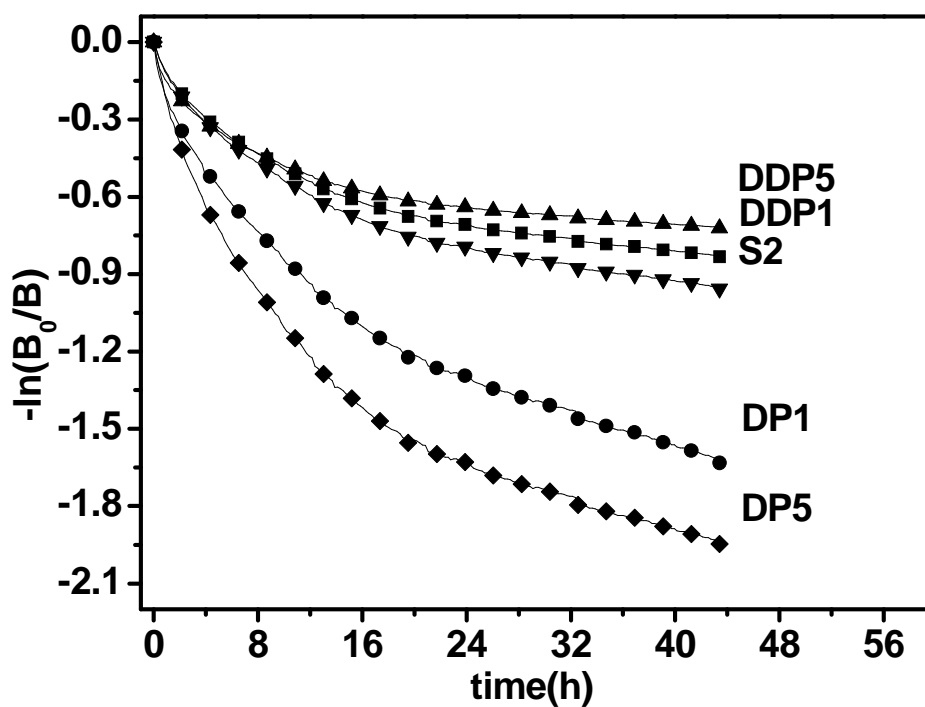



UV-vis spectra of P1 to P5 in film

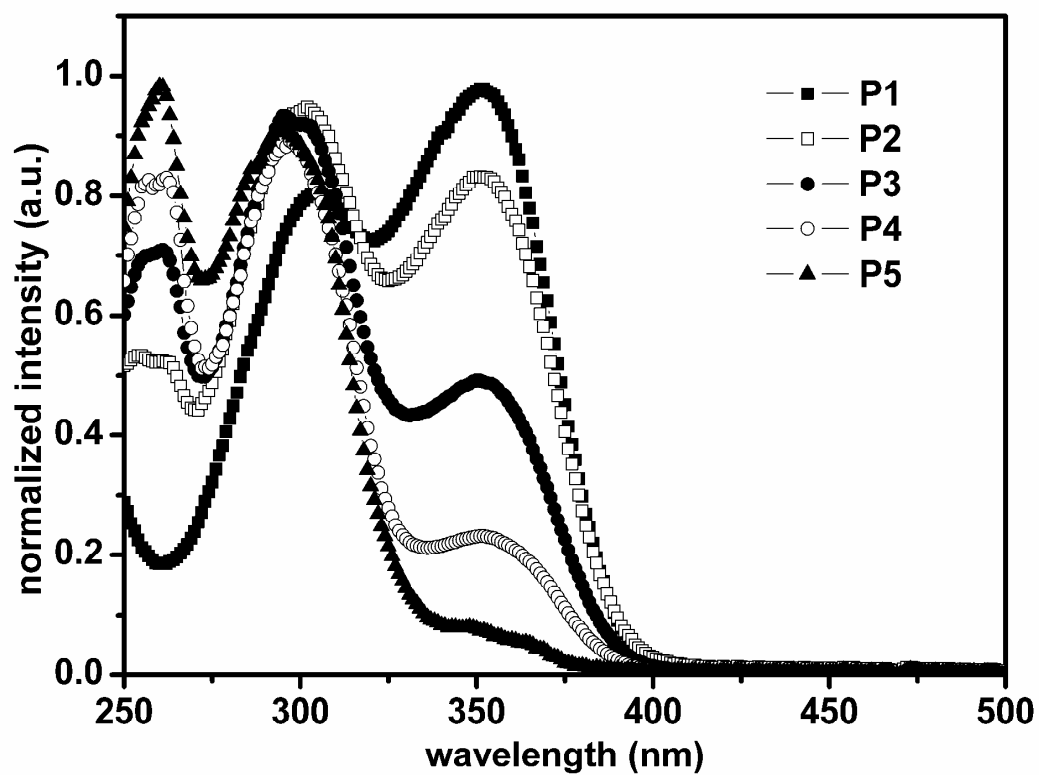

PL spectrum of P1 to P5 in 5mg/20mL in THF solution

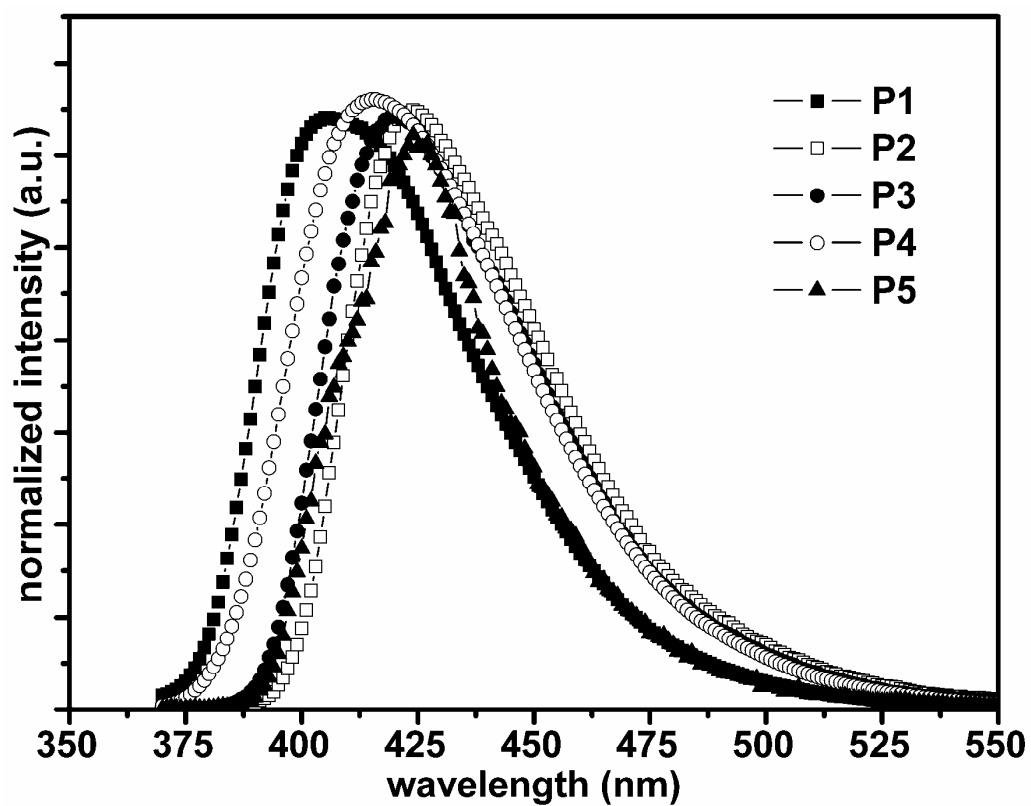

## FT-IR spectra of PU polymers

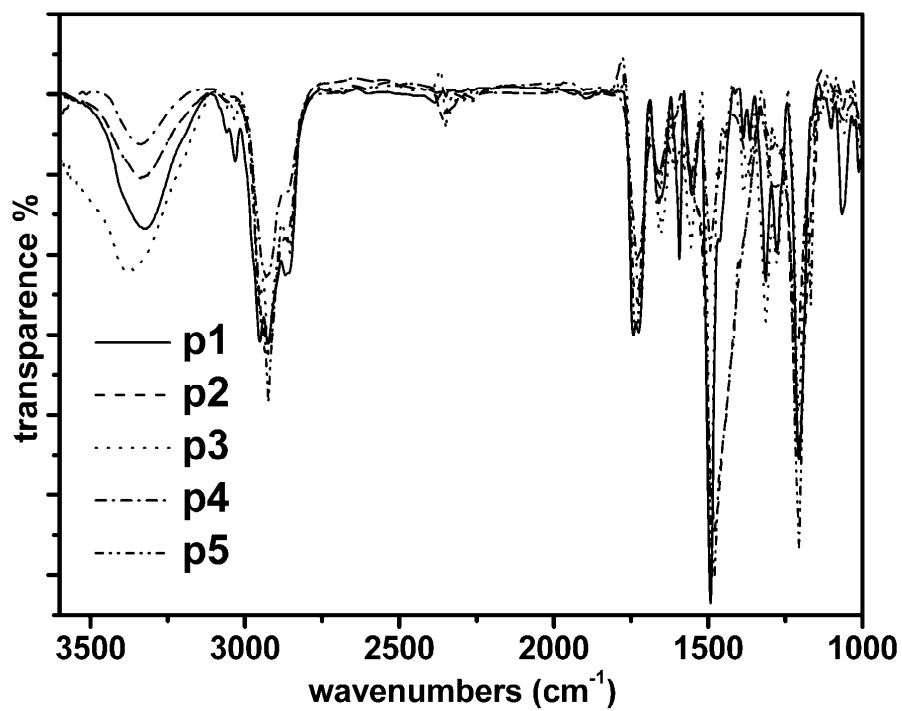

## DSC of PU polymers

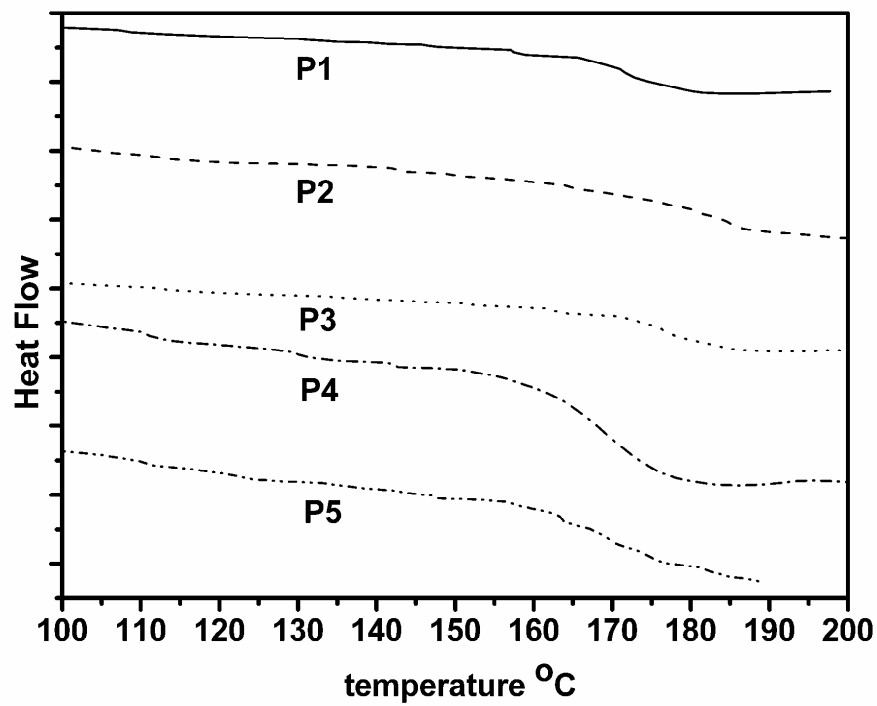

TGA figures of PU polymers and the value of  $T_d$  correspond to the 5%-weight-loss temperature.

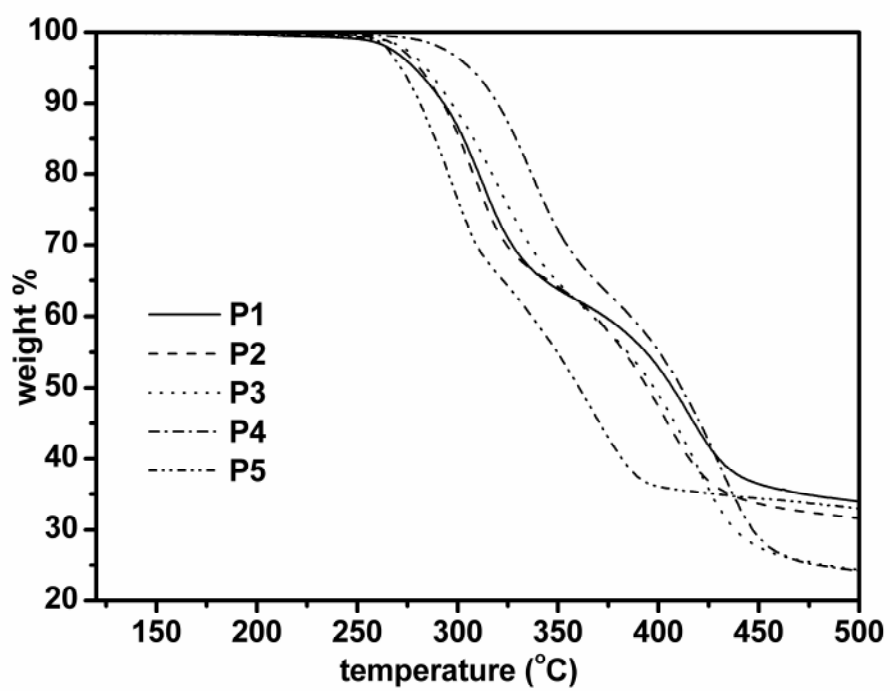

# The $^1\text{H}$ and $^{13}\text{C}$ NMR spectrum of the monomers including compound 1 to 6

## $^1\text{H}$ and $^{13}\text{C}$ NMR of *N,N'*-Bis(4-methoxyphenyl)-*N,N'*-diphenylbenzidine (1)

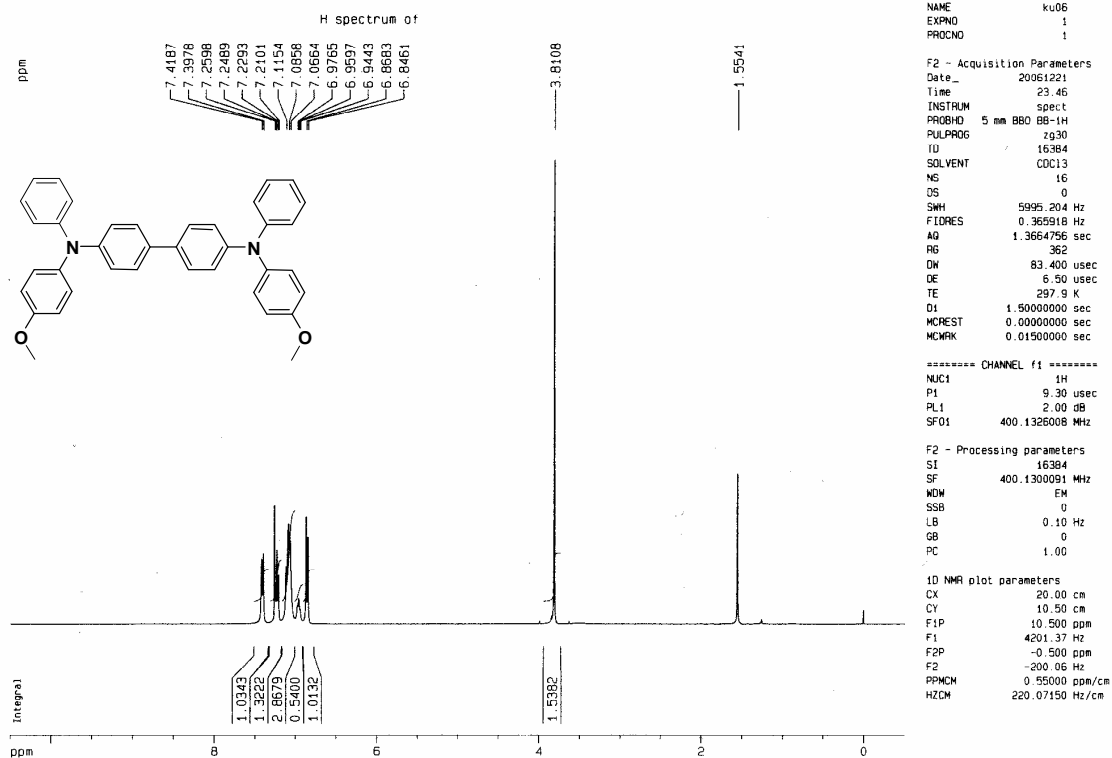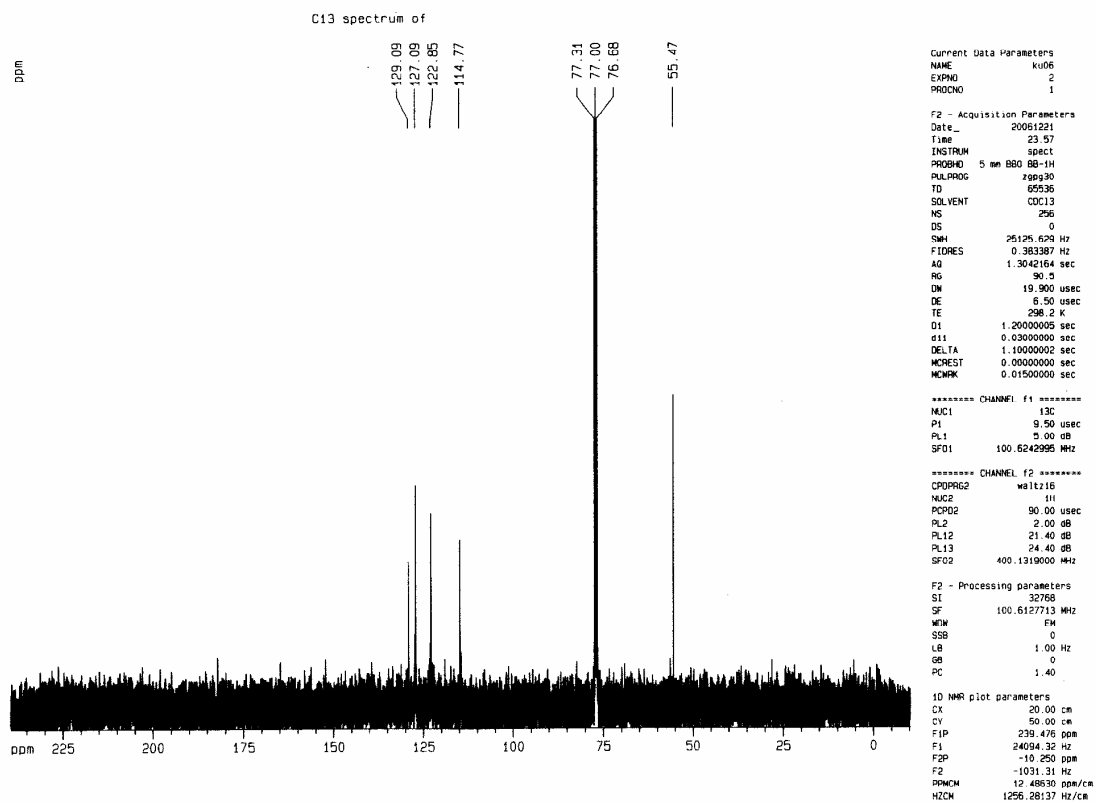

# $^1\text{H}$ and $^{13}\text{C}$ NMR of $N,N'$ -Bis(4-hydroxyphenyl)- $N,N'$ -diphenylbenzidine monomer (2)

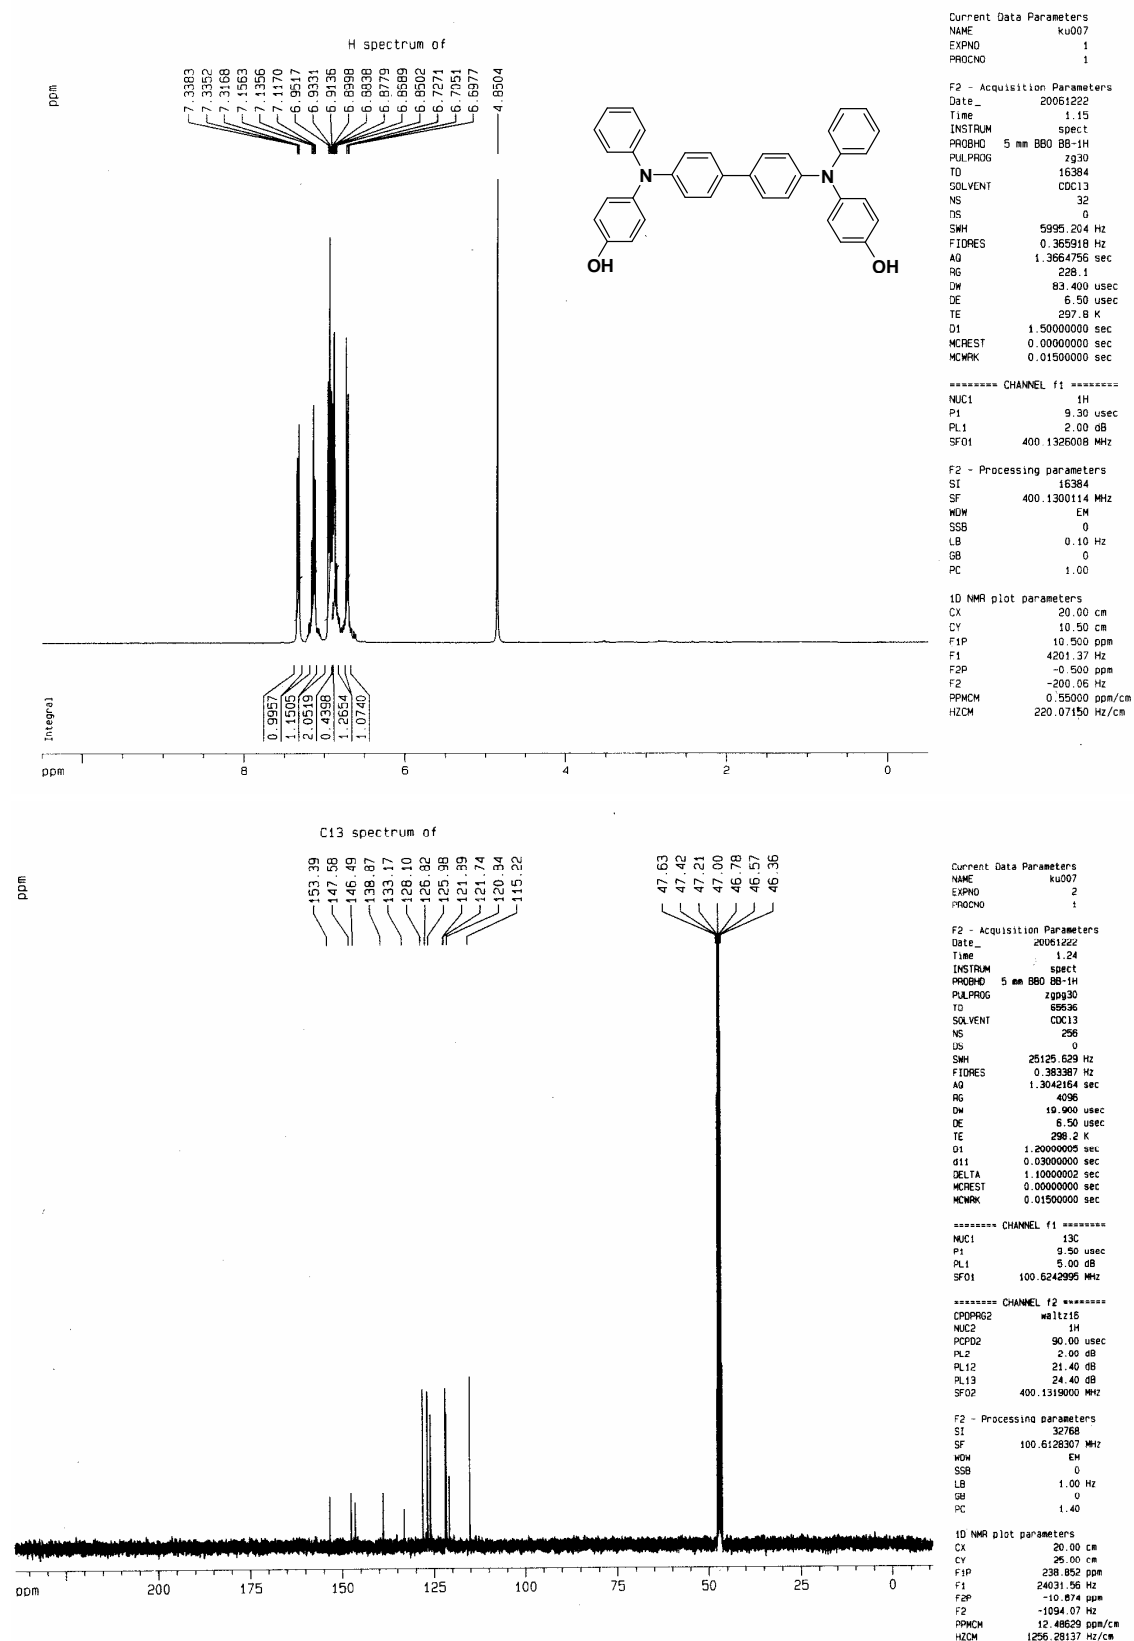

**$^1\text{H}$  and  $^{13}\text{C}$  NMR of 3,6-Dibromo-9H-carbazole (3)**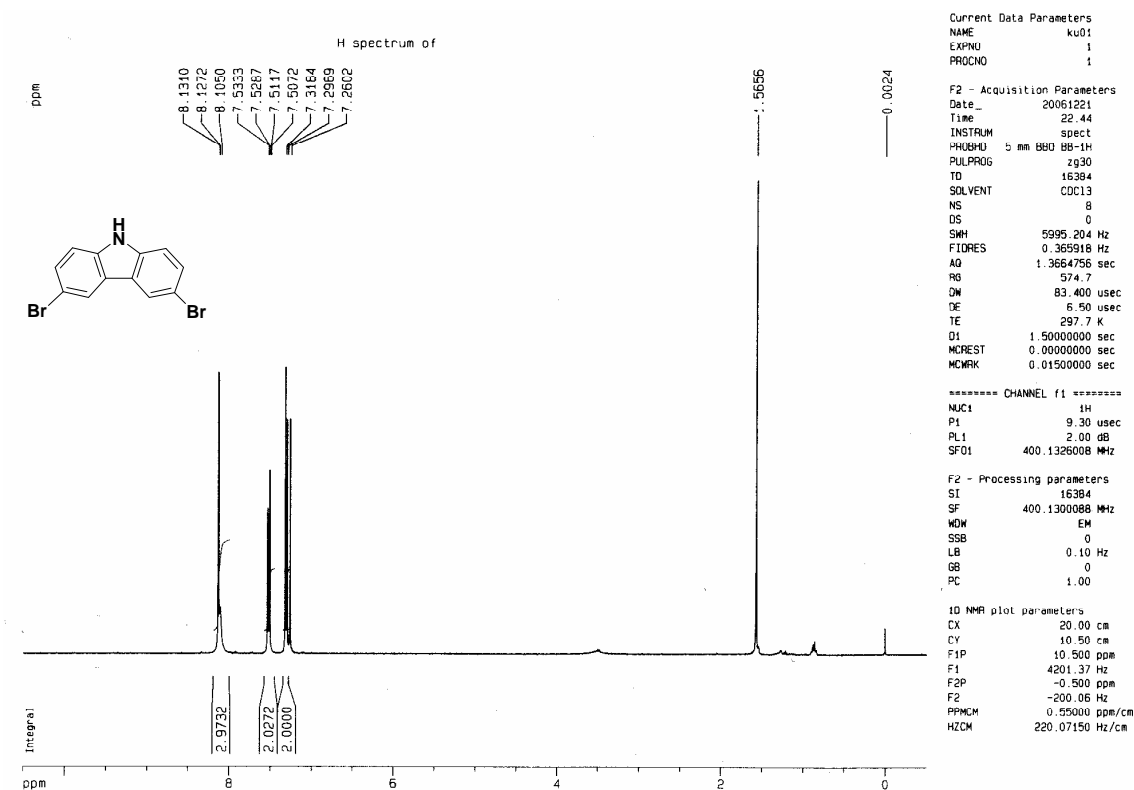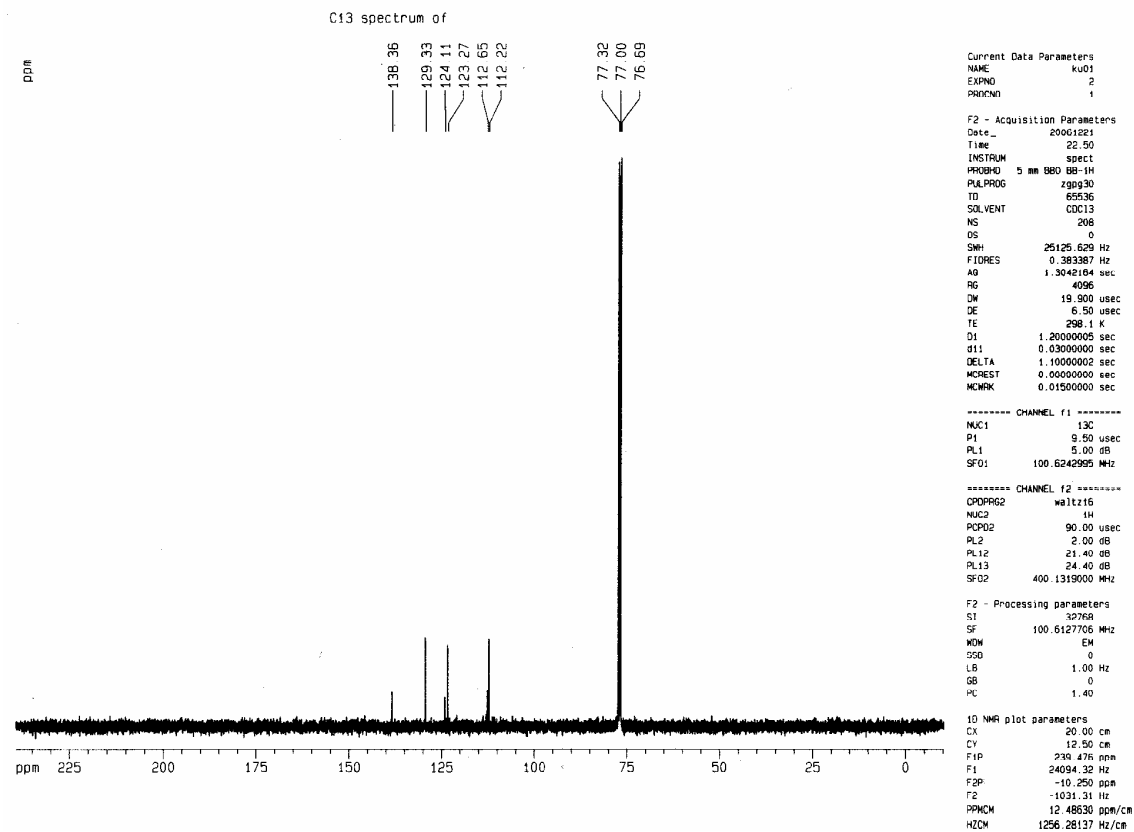

# <sup>1</sup>H and <sup>13</sup>C NMR of 3,6-Dibromo-9-butylcarbazole (4)

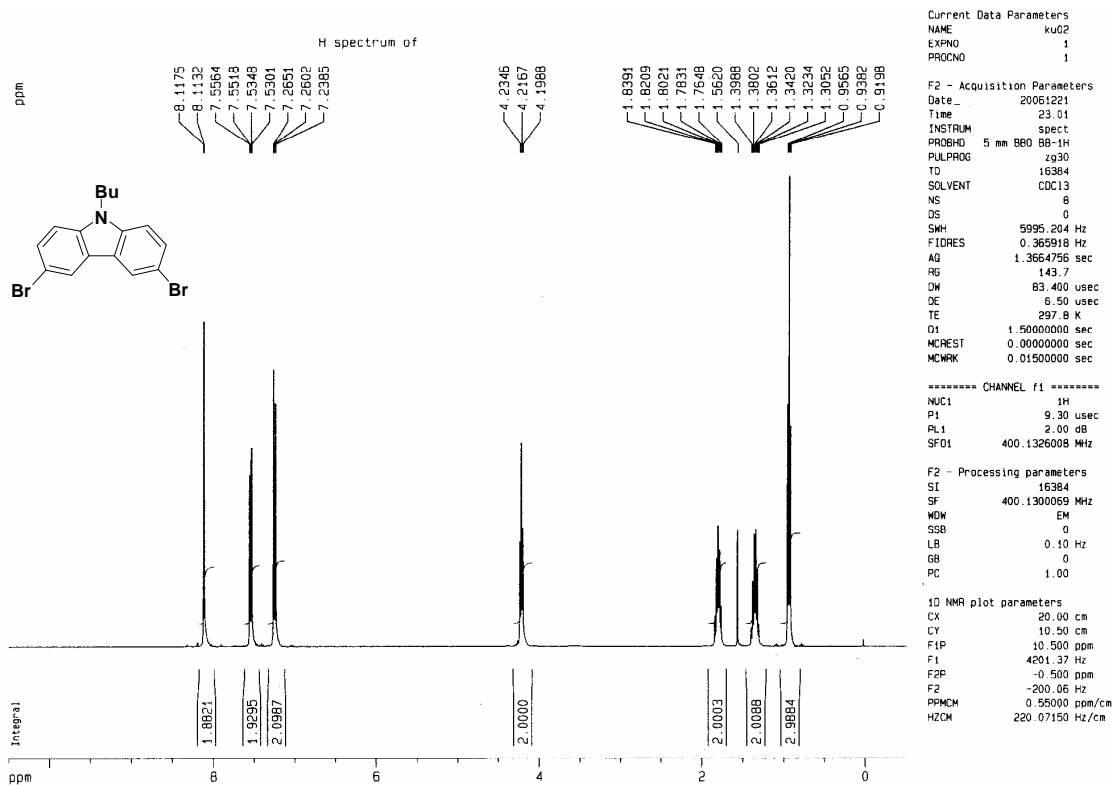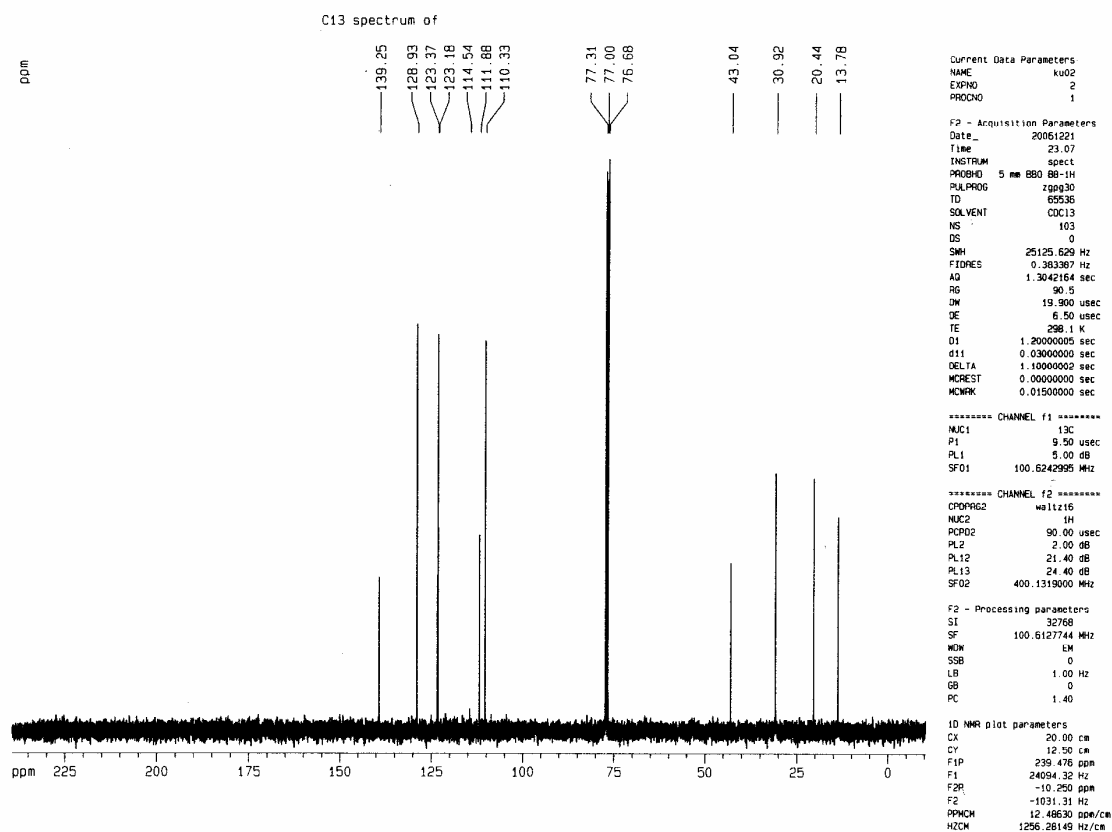

# <sup>1</sup>H and <sup>13</sup>C NMR of 9-Butyl-3,6-bis(4-methoxyphenyl)carbazole (5)

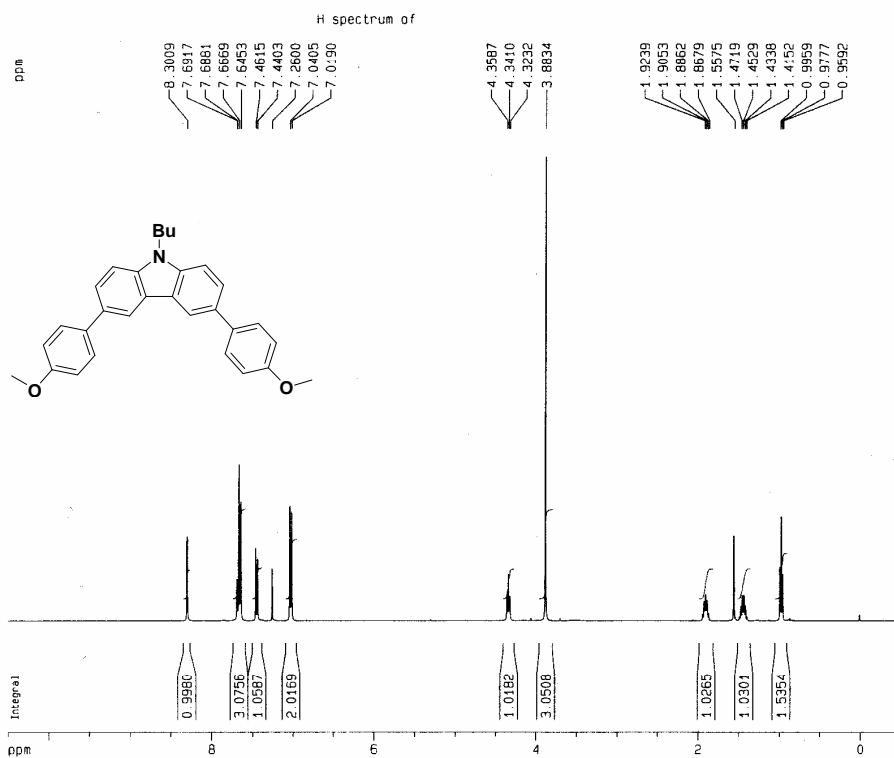

Current Data Parameters  
 NAME ku03  
 EXPNO 1  
 PROCNO 1

F2 - Acquisition Parameters  
 Date\_ 20061221  
 Time 23.13  
 INSTRUM spect  
 PROBHD 5 mm BBO BB-1H  
 PULPROG zg30  
 TD 16384  
 SOLVENT CDCl3  
 NS 8  
 DS 0  
 SWH 5995.204 Hz  
 FIDRES 0.365918 Hz  
 AQ 1.3664756 sec  
 RG 287.4  
 DW 83.400 usec  
 DE 6.50 usec  
 TE 297.8 K  
 D1 1.50000000 sec  
 MCREST 0.00000000 sec  
 MCWRR 0.01500000 sec

\*\*\*\*\* CHANNEL f1 \*\*\*\*\*  
 NUC1 1H  
 P1 9.30 usec  
 PL1 2.00 dB  
 SFO1 400.132608 MHz

F2 - Processing parameters  
 SI 16384  
 SF 400.1300091 MHz  
 MDW EH  
 SSB 0  
 LB 0.10 Hz  
 GB 0  
 PC 1.00

1D NMR plot parameters  
 CX 20.00 cm  
 CY 10.50 cm  
 F1P 10.500 ppm  
 F1 4201.37 Hz  
 F2P -0.500 ppm  
 F2 -200.06 Hz  
 PPMCM 0.95000 ppm/cm  
 HZCM 220.07150 Hz/cm

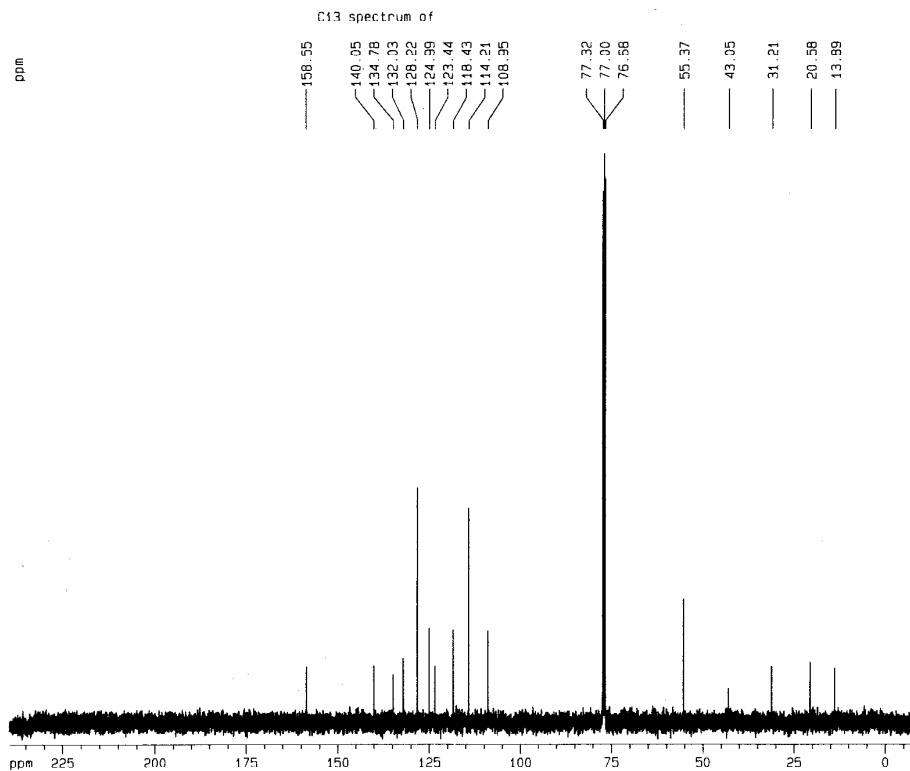

Current Data Parameters  
 NAME ku03  
 EXPNO 2  
 PROCNO 1

F2 - Acquisition Parameters  
 Date\_ 20061221  
 Time 23.20  
 INSTRUM spect  
 PROBHD 5 mm BBO BB-1H  
 PULPROG zgpg30  
 TD 65536  
 SOLVENT CDCl3  
 NS 108  
 DS 0  
 SWH 25125.629 Hz  
 FIDRES 0.383387 Hz  
 AQ 1.3042164 sec  
 RG 408  
 DW 19.900 usec  
 DE 6.50 usec  
 TE 298.2 K  
 D1 1.20000000 sec  
 d11 0.03000000 sec  
 DELTA 1.10000002 sec  
 MCREST 0.00000000 sec  
 MCWRR 0.01500000 sec

\*\*\*\*\* CHANNEL f1 \*\*\*\*\*  
 NUC1 13C  
 P1 9.50 usec  
 PL1 5.00 dB  
 SFO1 100.6243995 MHz

\*\*\*\*\* CHANNEL f2 \*\*\*\*\*  
 CPOPRG2 waltz16  
 NUC2 1H  
 PCPD2 90.00 usec  
 PL2 2.00 dB  
 PL12 21.40 dB  
 PL13 24.40 dB  
 SFO2 400.1319000 MHz

F2 - Processing parameters  
 SI 32768  
 SF 100.6127721 MHz  
 MDW EH  
 SSB 0  
 LB 1.00 Hz  
 GB 0  
 PC 1.40

1D NMR plot parameters  
 CX 20.00 cm  
 CY 12.50 cm  
 F1P 239.435 ppm  
 F1 24600.19 Hz  
 F2P -10.291 ppm  
 F2 -1035.44 Hz  
 PPMCM 12.48630 ppm/cm  
 HZCM 1256.28137 Hz/cm



**$^1\text{H}$  and  $^{13}\text{C}$  NMR of 9-Butyl-3,6-bis(4-hydroxyphenyl)carbazole (6)**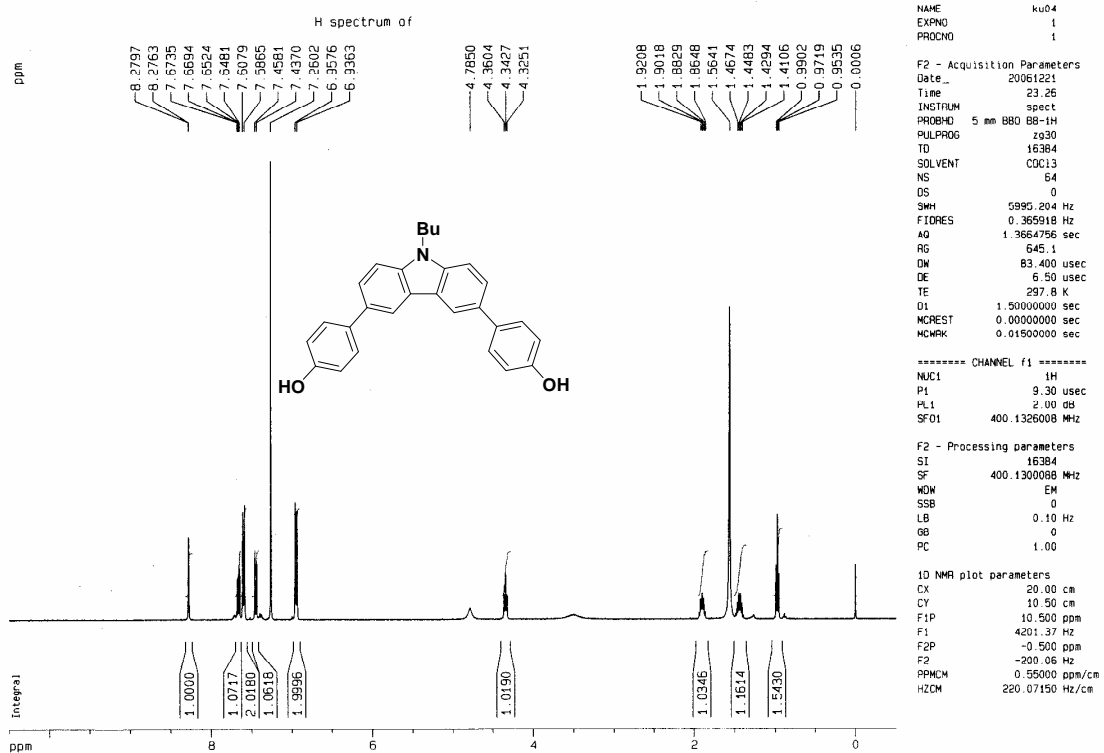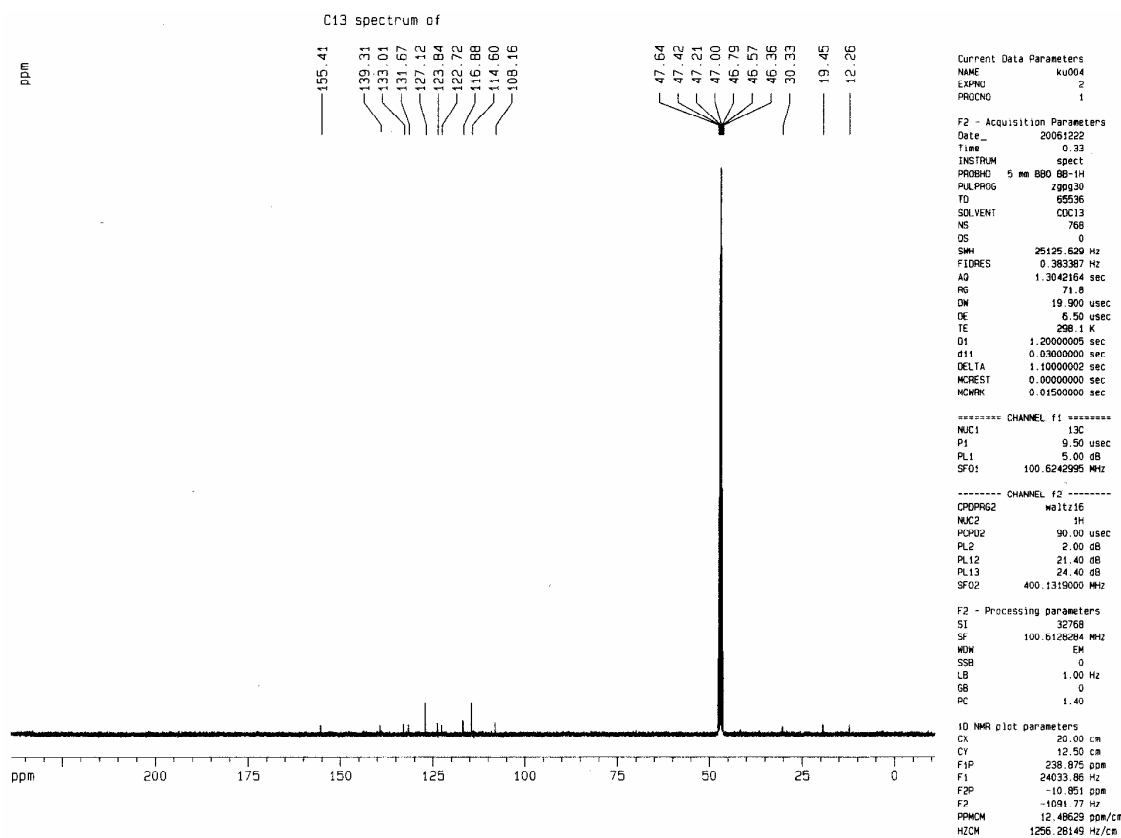

## The Mass spectrum of monomer 2 and 6

### Mass of *N,N'*-Bis(4-hydroxyphenyl)-*N,N'*-diphenylbenzidine monomer (2)

**C<sub>36</sub>H<sub>28</sub>N<sub>2</sub>O<sub>2</sub> Exact Mass: 520.3**

SPEC: ei132 03-DEC-07 Elapse: 00:03:30.0 197  
 Samp: ku007 Start : 11:38:44 283  
 Comm: EI 20eV  
 Mode: EI +Q1MS LMR UP LR  
 Oper: NTNU TSQ 700 Inlet : DIP  
 Base: 520.3 Inten : 2128738 Masses: 50 > 600  
 Norm: 520.3 RIC : 8395162 #peaks: 518  
 Peak: 1000.00 mmu  
 Aver: 185 > 195

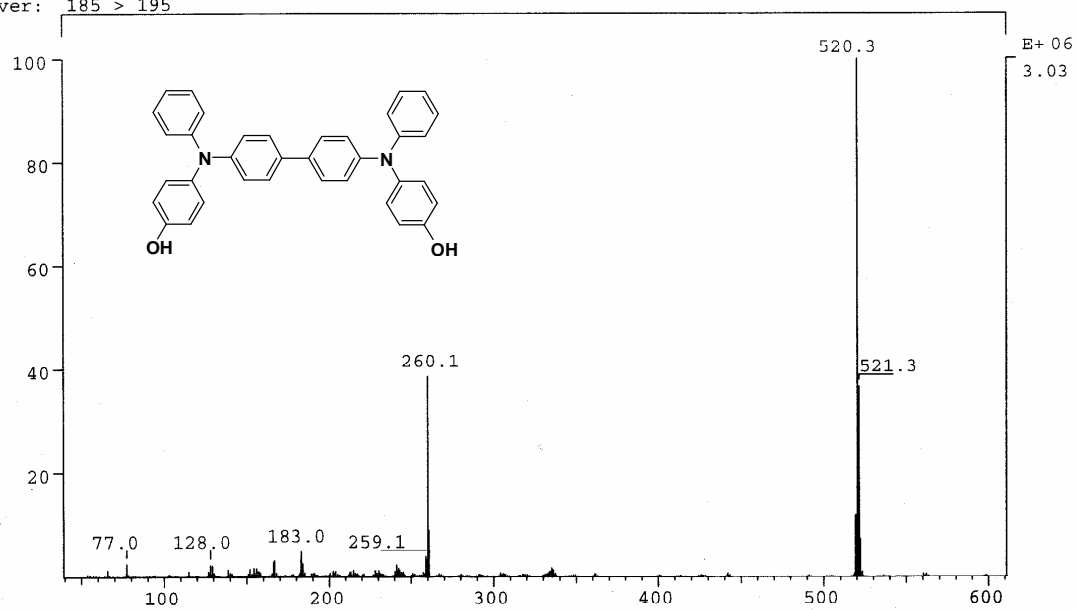

### Mass of 9-Butyl-3,6-bis(4-hydroxyphenyl)carbazole (6)

**C<sub>28</sub>H<sub>25</sub>N<sub>2</sub>O<sub>2</sub> Exact Mass: 407.2**

SPEC: ei1034 20-DEC-07 Elapse: 00:02:33.1 198  
 Samp: ku04 Start : 14:11:06 284  
 Comm: EI 20 eV  
 Mode: EI +Q1MS LMR UP LR  
 Oper: NTNU TSQ-700 Inlet : DIP  
 Base: 364.1 Inten : 178172 Masses: 50 > 500  
 Norm: 407.2 RIC : 1264957 #peaks: 435  
 Peak: 1000.00 mmu  
 Aver: 150 > 160

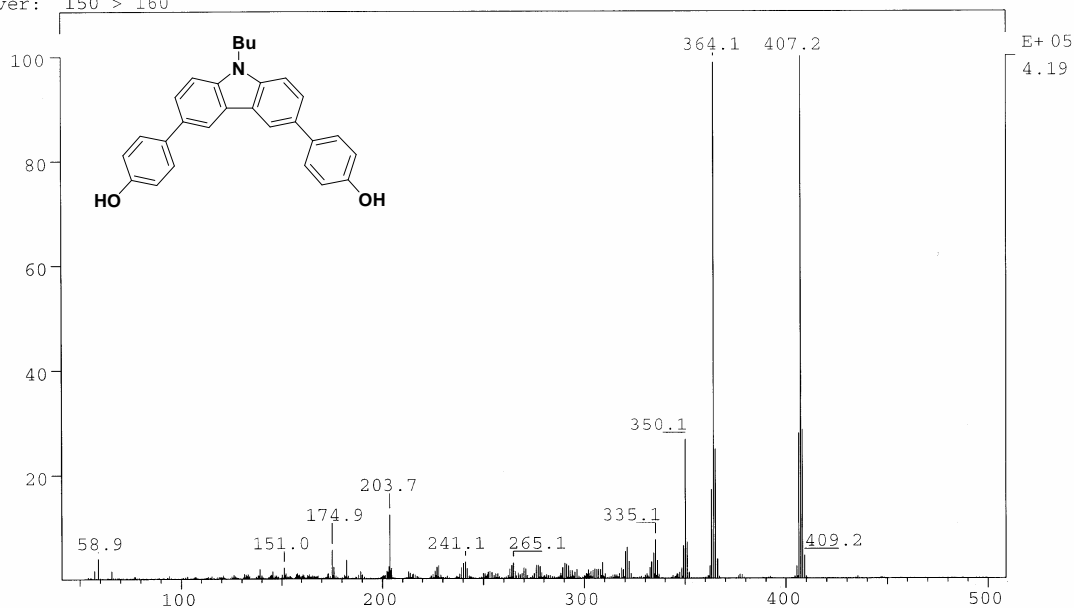

# The H-NMR spectrum of PU polymers from P1 to P5

## P1

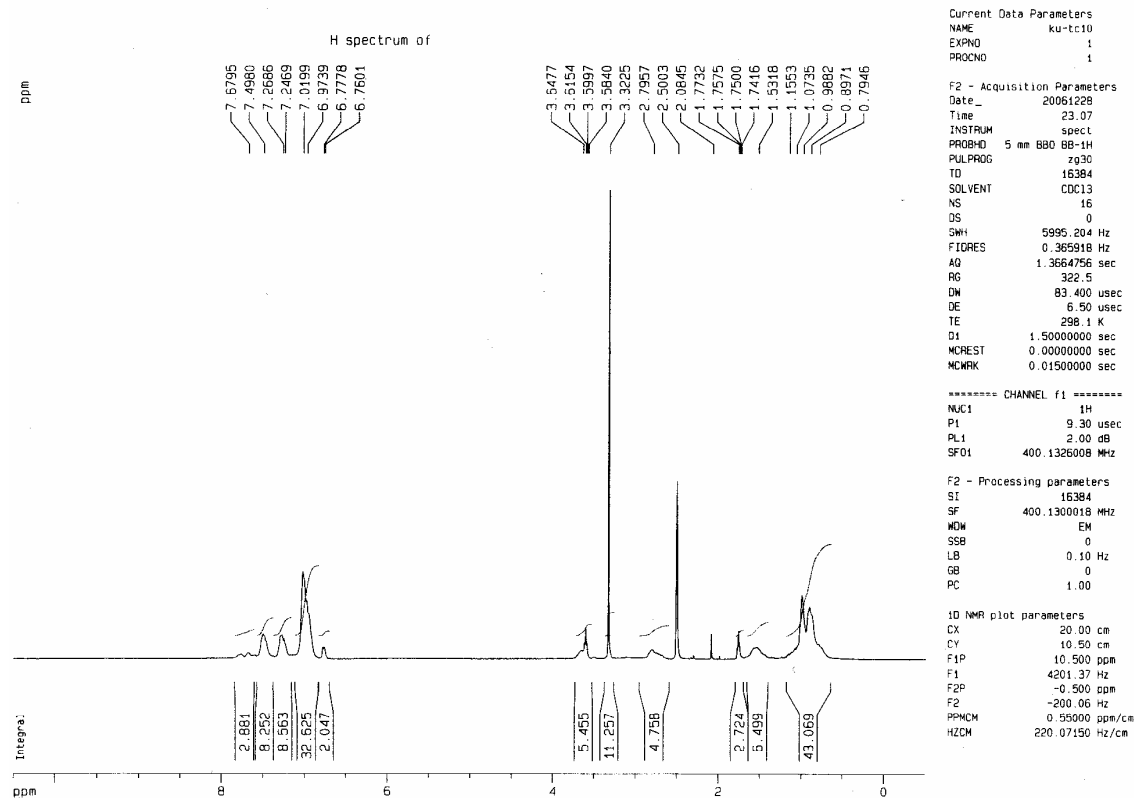

## P2

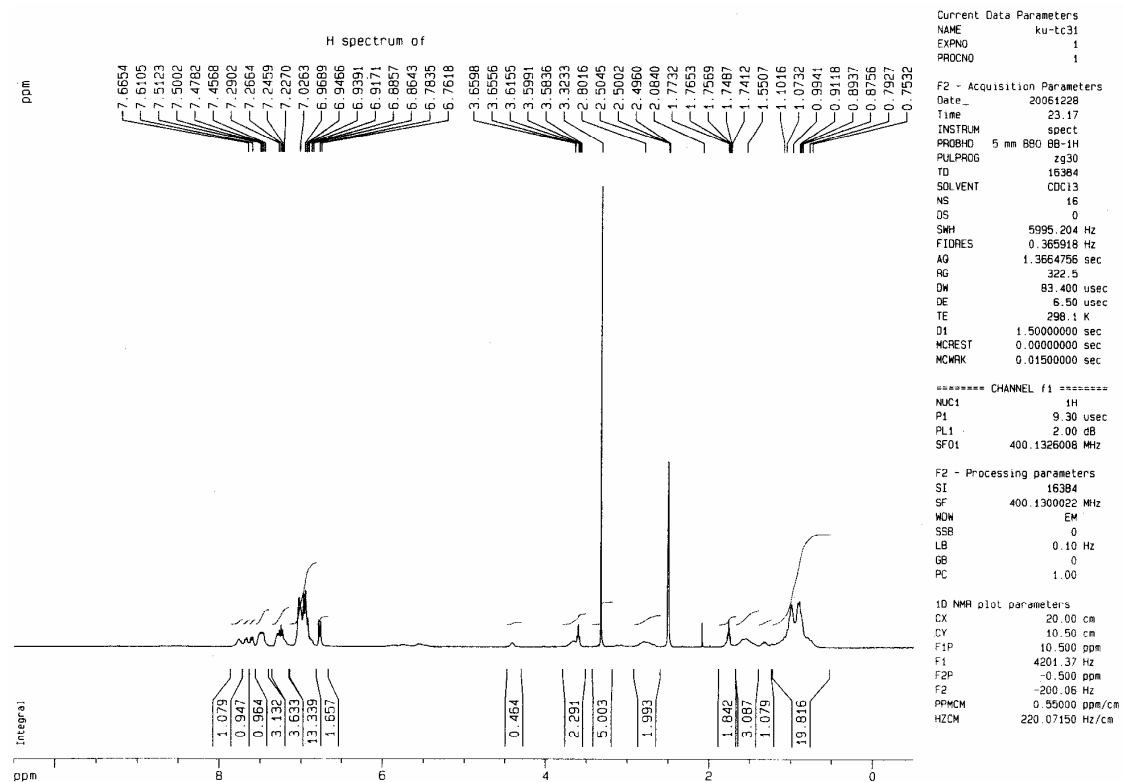

P3

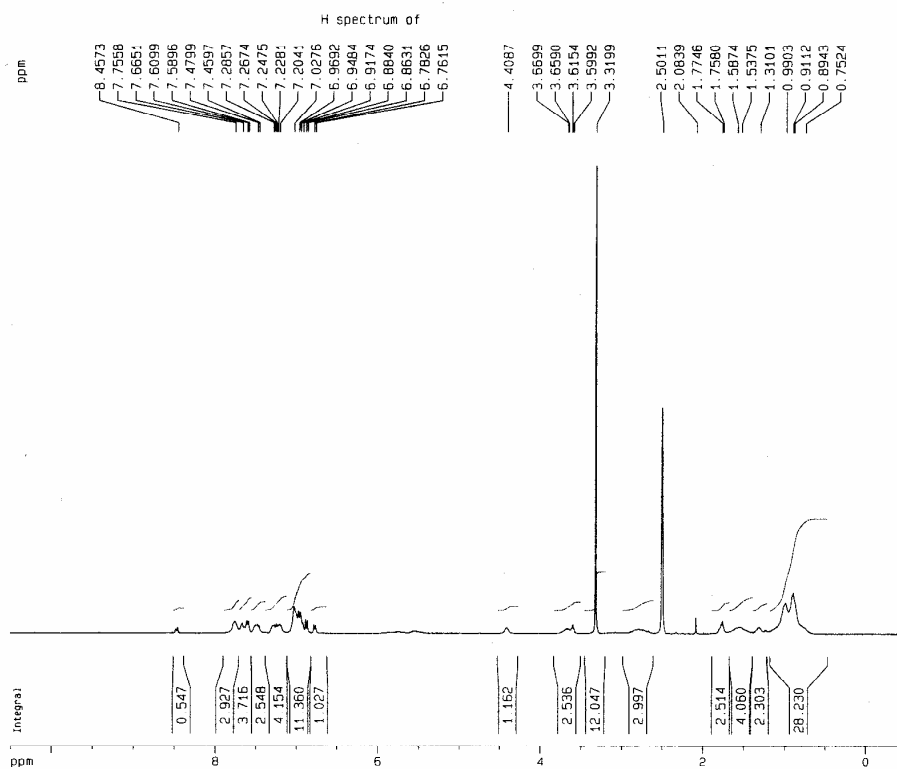

Current Data Parameters  
 NAME ku-tc11  
 EXPNO 1  
 PROCNO 1

F2 - Acquisition Parameters  
 Date\_ 20061228  
 Time 23 22  
 INSTRUM spect  
 PROBD 5 mm BBO BB-1H  
 PULPROG zg30  
 TO 16384  
 SOLVENT CDCl3  
 NS 16  
 DS 0  
 SWH 5995.204 Hz  
 FIDRES 0.365918 Hz  
 AQ 1.3664756 sec  
 RG 456.1  
 DW 83.400 usec  
 DE 6.50 usec  
 TE 298.1 K  
 D1 1.50000000 sec  
 MCREST 0.00000000 sec  
 MCWRR 0.01500000 sec

----- CHANNEL f1 -----  
 NUC1 1H  
 P1 9.30 usec  
 PL1 2.00 dB  
 SF01 400.1326008 MHz

F2 - Processing parameters  
 SI 16384  
 SF 400.1300022 MHz  
 MCW EM  
 SSB 0  
 LB 0.10 Hz  
 GB 0  
 PC 1.00

1D NMR plot parameters  
 CX 20.00 cm  
 CY 10.50 cm  
 FIP 10.500 ppm  
 F1 4201.37 Hz  
 F2P -0.500 ppm  
 F2 -200.06 Hz  
 PPMCM 0.45500 ppm/cm  
 HZCM 220.07150 Hz/cm

P4

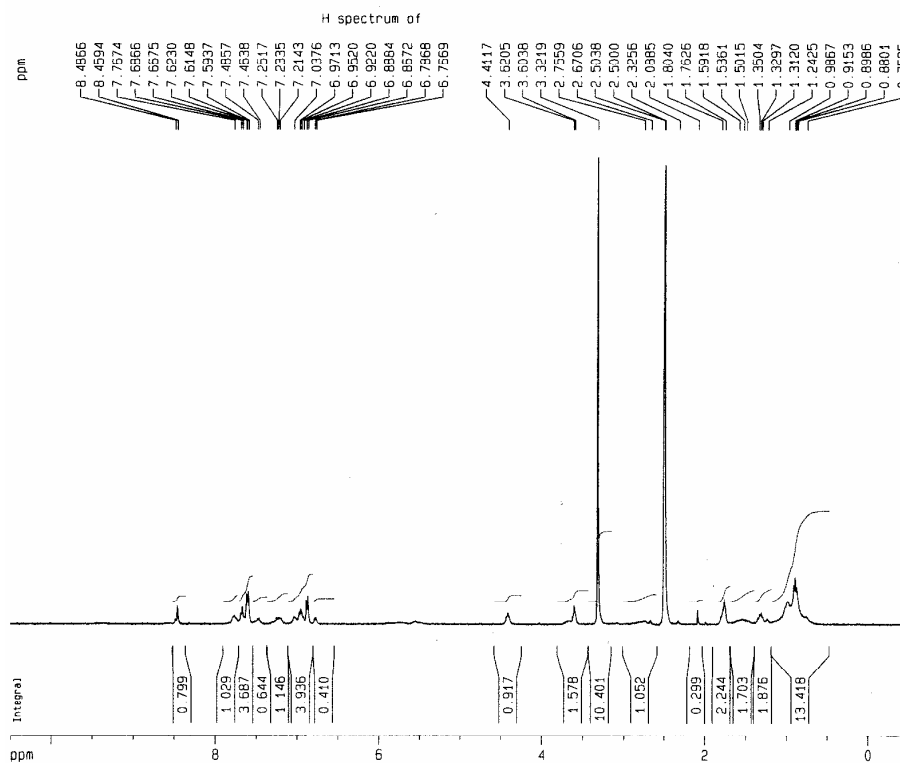

Current Data Parameters  
 NAME ku-tc13  
 EXPNO 1  
 PROCNO 1

F2 - Acquisition Parameters  
 Date\_ 20061228  
 Time 23 28  
 INSTRUM spect  
 PROBD 5 mm BBO BB-1H  
 PULPROG zg30  
 TO 16384  
 SOLVENT CDCl3  
 NS 16  
 DS 0  
 SWH 5995.204 Hz  
 FIDRES 0.365918 Hz  
 AQ 1.3664756 sec  
 RG 456.1  
 DW 83.400 usec  
 DE 6.50 usec  
 TE 298.1 K  
 D1 1.50000000 sec  
 MCREST 0.00000000 sec  
 MCWRR 0.01500000 sec

----- CHANNEL f1 -----  
 NUC1 1H  
 P1 9.30 usec  
 PL1 2.00 dB  
 SF01 400.1326008 MHz

F2 - Processing parameters  
 SI 16384  
 SF 400.1300015 MHz  
 MCW EM  
 SSB 0  
 LB 0.10 Hz  
 GB 0  
 PC 1.00

1D NMR plot parameters  
 CX 20.00 cm  
 CY 10.50 cm  
 FIP 10.500 ppm  
 F1 4201.37 Hz  
 F2P -0.500 ppm  
 F2 -200.06 Hz  
 PPMCM 0.55000 ppm/cm  
 HZCM 220.07150 Hz/cm

P5

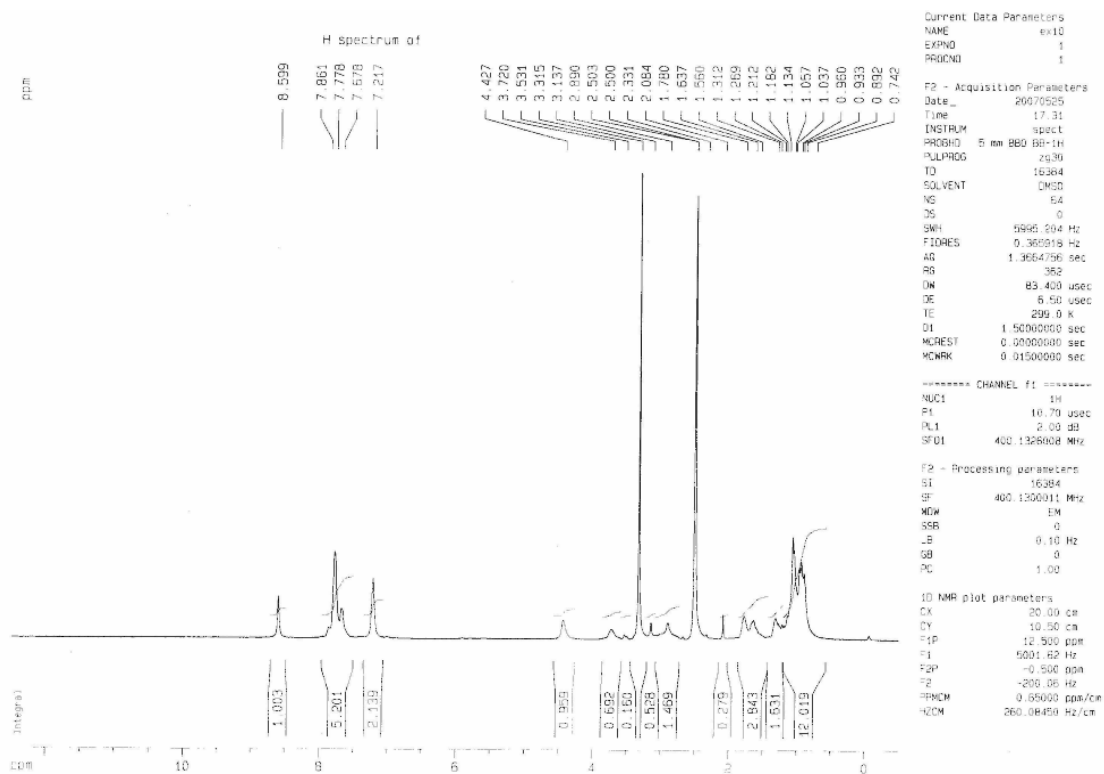

## Reference

- Huang, J.; Niu, Y. H.; Yang, W.; Mo, Y. Q.; Yuan, M.; Cao, Y. *Macromolecules* **2002**, *35*, 6080.
- (a) Liu, M. S.; Jiang, X.; Liu, S.; Herguth, P.; Jen, A. K.-Y. *Macromolecules* **2002**, *35*, 3532–3536. (b) De Leeuw, D. M.; Simenon, M. M. J.; Brown, A. B.; Einerhand, R. E. F. *Synth. Met.* **1997**, *87*, 53–54.
- Kuo, C. H.; Peng, K. C.; Kuo, L. C.; Yang, K. H.; Lee, J. H.; Leung, M. K.; Hsieh, K. H. *Chem. Mater.* **2006**, *18*, 4121.
